# Supplementary material
Source: publisher figshare collection journal article supplement (https://aacr.figshare.com/articles/dataset/_/22472792)
Supplement: Supplementary file 1 [file 39924299]

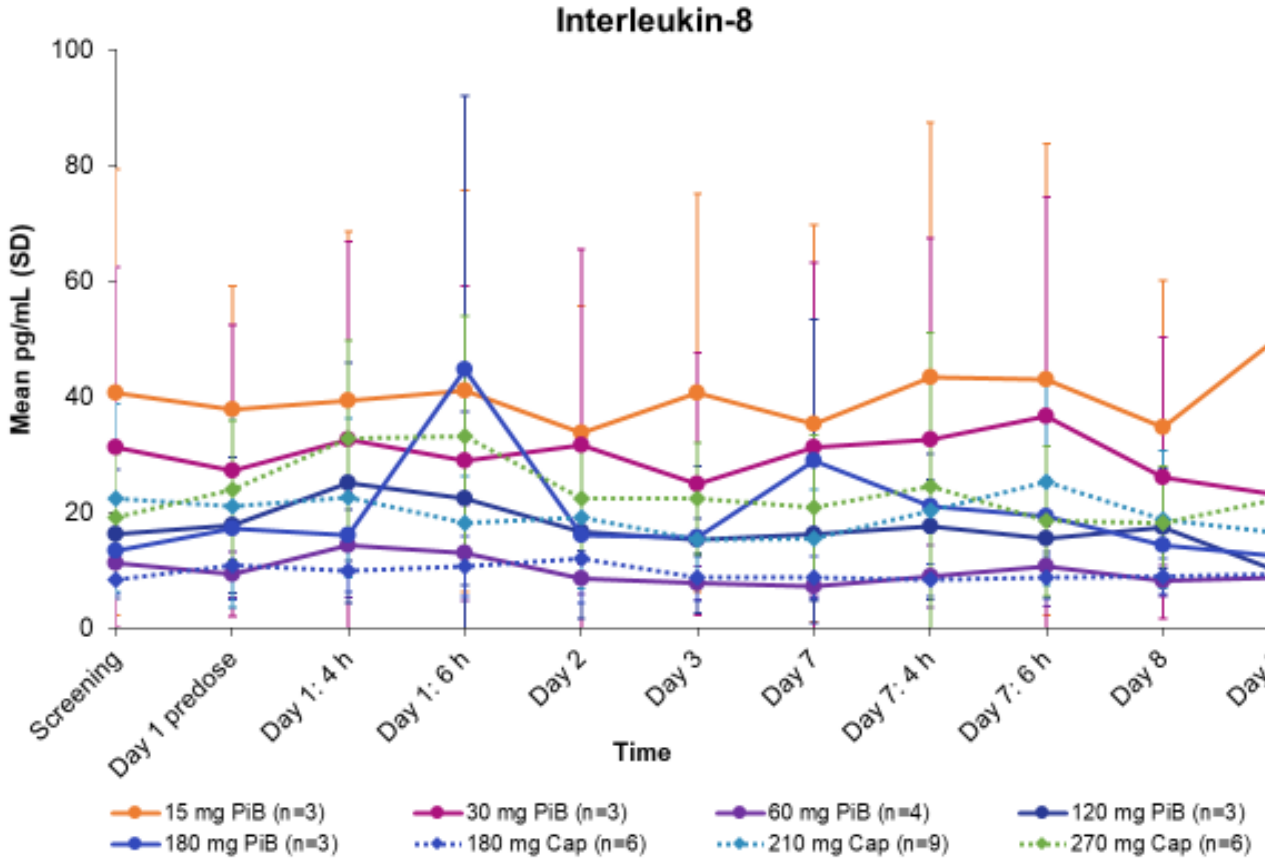

**Figure S3.**

Figure S3 shows changes in interleukin-8 in plasma from screening thru day 9 at the indicated doses. Cap, capsule.
